# Supplementary material for: The effects of repeated sprints on mid-range and three-point jump shot biomechanics in elite basketball players
Source: PeerJ. 2025 Sep 12;13:e19983. doi: 10.7717/peerj.19983 (PMC12435330; doi:10.7717/peerj.19983)
Supplement: Supplemental Information 1 — Statistical information on peak angular velocity. [file peerj-13-19983-s001.xlsx]

## Sheet: participant information
	Age	Height	Body Mass	Body Fat	Experience
S1	21.1	190.11	86	10.2	13.1
S2	19.3	184.38	80	7.8	12.1
S3	19.8	176.75	78	6.5	9.1
S4	19.3	187.99	84.6	10.1	12.1
S5	19.3	189.99	85.9	11	12.1
S6	20.2	192.21	87.2	12.3	9.1
S7	21.1	195.52	87.8	13.1	13.1
S8	20.2	187.09	85	8.9	11.1
S9	19.3	192.76	86.1	11.4	11.1
S10	20.2	195.52	86.6	11.8	11
S11	21.1	193.31	89.3	14.6	13.1
S12	20.5	194.97	90.4	15.5	14
MEAN	20.1167	190.05	85.575	11.1	11.75
SD	0.728427	5.46673	3.51752	2.63439	1.54773

## Sheet: mid-range shot
Non-fatigue									Fatigue
	ankle	knee	hip	wrist	elbow	shoulder				ankle	knee	hip	wrist	elbow	shoulder
S1	720	768	300	1909	1728	1152			S1	715	786	353	1737	1402	775
	735	784	315	1930	1745	1170				804	804	371	1753	1413	784
	705	750	385	1890	1705	1135				853	872	342	1796	1389	760
	722	772	395	1907	1732	1148				786	789	356	1734	1405	772
S2	691	940	448	1707	2016	765			S2	685	941	445	1334	1705	691
	705	960	465	1728	2040	780				670	960	466	1346	1720	704
	678	930	430	1692	1998	750				637	926	456	1318	1688	680
	690	950	455	1717	2025	770				706	946	485	1339	1712	696
S3	653	864	538	2004	1248	1084			S3	592	753	520	1509	1395	576
	672	768	518	2074	1632	768				470	847	467	1368	1473	730
	576	864	500	1659	1612	960				753	941	458	1382	1395	607
	672	816	480	1590	1632	892				602	847	492	1348	1458	484
S4	1344	960	428	1175	576	672			S4	1223	847	460	1590	1395	722
	1360	944	444	1192	592	688				1207	816	380	1599	1407	730
	1328	976	420	1164	560	656				1235	853	347	1580	1413	716
	1352	952	436	1181	580	680				1226	843	371	1596	1397	728
S5	720	307	244	2052	1576	595			S5	780	441	292	1590	1519	484
	735	320	252	2066	1588	610				735	453	304	1607	1534	492
	710	295	238	2038	1562	582				662	436	297	1575	1514	479
	725	310	248	2048	1570	600				770	449	286	1378	1528	488
S6	710	787	413	1714	2361	595			S6	673	753	397	1521	1783	1106
	726	802	428	1728	2380	611				789	770	309	1537	1797	1121
	696	775	400	1698	2339	590				765	736	385	1505	1761	1096
	715	793	420	1725	2371	603				798	650	402	1527	1785	1111
S7	672	576	307	1728	1824	672			S7	831	749	365	1446	1395	722
	690	590	320	1746	1840	690				798	764	356	1458	1407	733
	660	560	300	1714	1805	670				787	735	352	1573	1379	712
	670	585	315	1735	1835	685				780	757	369	1449	1402	726
S8	776	758	383	1725	1663	754			S8	810	758	342	1513	1526	742
	783	738	380	1726	1625	791				827	783	336	1512	1516	737
	729	780	380	1736	1666	789				823	742	365	1513	1524	749
	813	722	410	1734	1616	756				759	694	328	1524	1502	719
S9	804	732	380	1737	1653	782			S9	800	781	361	1525	1551	732
	782	739	396	1726	1661	762				800	748	439	1527	1501	725
	776	747	380	1742	1658	753				810	767	450	1496	1534	714
	819	777	386	1716	1653	782				824	764	410	1534	1523	761
S10	802	794	388	1749	1660	755			S10	831	783	447	1510	1510	707
	775	765	348	1711	1631	826				800	789	420	1549	1526	754
	776	758	390	1736	1668	773				774	786	377	1536	1534	742
	780	764	405	1755	1659	765				790	806	298	1529	1520	749
S11	774	721	408	1732	1661	772			S11	820	807	370	1516	1533	742
	763	764	408	1743	1677	773				808	770	328	1547	1567	725
	782	755	432	1728	1626	791				823	752	367	1478	1516	713
	800	760	357	1712	1668	774				835	764	333	1521	1523	730
S12	820	740	402	1755	1656	781			S12	807	774	345	1519	1527	747
	741	747	372	1747	1677	772				823	763	332	1514	1518	746
	804	695	350	1718	1652	762				804	755	362	1506	1541	721
	750	697	390	1745	1669	795				865	769	334	1511	1532	750
MEAN	785.021	742.729	387.229	1733	1657.73	772.521			MEAN	803.438	767.062	379.729	1518.23	1522.81	731.875
SD	178.594	164.798	67.5817	205.563	400.174	149.163			SD	148.763	117.304	58.5879	104.426	115.681	140.7
non-fatigue									fatigue
	RA（°）	EA（°）	Shooting Score	SS（s）						RA（°）	EA（°）	Shooting Score	SS（s）
S1	52.8	33.8	4	0.6					S1	53	36.2	10	0.63
	53.5	35.6	8	0.5						52.9	37	10	0.75
	50.8	36.1	8	0.51						52.3	33	2	0.76
	54	35.2	4	0.46						57.2	30	4	0.77
S2	52	40.7	8	0.43					S2	54.1	35.3	10	0.69
	51	38	4	0.45						55	40.6	10	0.76
	54.5	40.4	8	0.47						59	41.7	10	0.5
	55	35	6	0.5						52.7	35.5	8	0.87
S3	63.2	41	6	0.63					S3	57.1	42	4	0.6
	58.8	36.3	6	0.5						56.4	37.4	10	0.61
	62.3	34.2	6	0.45						56.8	31.2	2	0.63
	61.5	37	4	0.55						53.5	30.1	8	0.63
S4	60	37.8	8	0.6					S4	58.5	28.5	4	0.7
	61.8	36.7	4	0.46						57.1	38.7	10	0.67
	61.9	37	8	0.46						57	34.8	4	0.67
	64	34	8	0.4						58	36.5	10	0.63
S5	65	36	8	0.45					S5	59	34.1	10	0.62
	63	35	10	0.59						58.8	33.5	4	0.6
	63.1	37.7	4	0.61						65	35.2	4	0.63
	66.7	35	4	0.5						56.9	30.6	6	0.63
S6	65	38.2	10	0.51					S6	62	40.5	10	0.63
	66	38.8	10	0.46						55	34.8	4	0.6
	60	33.1	8	0.44						56	33.8	8	0.67
	63.7	35.6	4	0.63						61.7	45.2	4	0.7
S7	62.4	32	8	0.47					S7	50.3	36.1	8	0.63
	60.4	30.6	6	0.57						55	38.1	10	0.6
	43.5	46.2	8	0.6						48.8	44.2	4	0.63
	47.9	43.1	10	0.57						53	42.2	4	0.6
S8	45	40.1	10	0.6					S8	45.9	40.4	10	0.63
	46.4	45	6	0.6						49.3	41	6	0.63
	49.1	43.1	10	0.6						48.9	45.4	4	0.63
	55.3	41.8	8	0.67						55.5	47.3	10	0.63
S9	54	51	10	0.7					S9	56.4	49.5	10	0.6
	55	39.1	6	0.67						49	43.1	10	0.63
	53.7	40.5	10	0.67						55.9	49.4	6	0.6
	51.2	42.5	10	0.7						57.8	40.2	6	0.63
S10	44.8	48.4	10	0.73					S10	41.7	32.5	2	0.67
	42.5	43.5	10	0.67						41.4	38.7	4	0.7
	48	45.9	4	0.7						43.6	43	10	0.7
	45.2	43.7	4	0.7						40.5	42.5	6	0.67
S11	44.8	46.9	10	0.67					S11	42.3	39.2	6	0.67
	46.5	38.7	6	0.69						47.3	39	10	0.5
	44.4	39.6	4	0.6						50.1	34	4	0.65
	49.2	42.9	10	0.79						52.1	30	4	0.66
S12	42.1	37	8	0.71					S12	50.6	37	10	0.63
	44.4	40.1	10	0.68						54.5	32	10	0.75
	54.4652	39.1283	4	0.576522						55.6171	38.2683	8	0.653659
	54.7	39.3	8	0.59						53.6	38	10	0.66
MEAN	54.4701	39.1318	7.25	0.576803					MEAN	53.4191	37.8598	7.04167	0.65216
SD	7.52105	4.46365	2.34254	0.0995035					SD	5.52374	5.14229	2.88767	0.0639796

## Sheet: long-range shot
Non-fatigue									Fatigue
	ankle	knee	hip	wrist	elbow	shoulder				ankle	knee	hip	wrist	elbow	shoulder
S1	819	1104	457	2688	1939	710			S1	931	1171	564	2332	1766	634
	1253	883	559	2448	1708	1017				662	900	512	2215	1416	1181
	868	1046	500	2862	1536	1248				834	1042	542	2612	1920	960
	909	988	457	2929	1344	960				1056	1152	508	2208	1632	672
S2	1637	1680	544	2432	1334	902			S2	816	1468	594	2092	1459	763
	1507	1421	501	2564	1200	845				1273	1786	508	2264	1209	864
	909	1152	457	2908	2671	816				1294	1747	365	2664	2634	749
	908	998	511	2504	1632	864				768	1085	493	1856	1824	595
S3	949	970	613	2275	1612	1065			S3	787	930	635	1977	1536	691
	885	940	592	2688	1756	979				865	1036	641	2072	2064	969
	738	912	603	2304	1892	768				1445	1084	676	2045	1929	845
	908	998	625	2304	1632	864				768	1085	693	1884	1824	595
S4	738	614	509	2016	1872	1248			S4	1098	960	439	2072	1536	902
	813	633	483	2476	1843	1238				1152	844	428	2252	1939	1104
	1213	960	461	2678	1862	1132				1326	1104	445	2379	1958	1200
	1415	1075	348	2976	1824	768				1392	1056	484	2332	1872	1056
S5	738	960	477	2880	2112	912			S5	1098	1036	498	2630	1968	662
	813	596	427	2755	2238	960				1152	892	426	2860	2016	682
	1213	758	407	2476	2208	787				1326	950	498	2304	2083	864
	1415	662	412	1920	2112	768				1392	672	421	1907	2016	845
S6	949	1056	451	2285	1958	1152			S6	1208	942	430	2174	2025	1565
	924	1056	450	2115	2083	1142				1068	1152	365	2246	2188	1113
	1314	1017	510	2332	2592	672				1336	1152	460	1824	2400	1334
	947	1171	450	2295	1958	1824				739	1046	345	1536	2208	902
S7	1112	455	482	2517	2150	1133			S7	1094	710	355	2253	1459	1132
	1213	1008	505	2611	1920	777				921	892	393	2152	2208	1056
	1293	1286	457	2592	1430	720				1356	1152	432	2216	1400	701
	1187	1058	408	2680	1620	750				1250	1100	450	2280	1560	760
S8	824	734	434	2421	1683	763			S8	1071	1053	504	2185	1846	925
	814	763	499	2411	1688	816				1054	1096	466	2199	1860	904
	807	759	365	2410	1648	787				1075	1053	492	2173	1861	932
	788	750	433	2395	1674	750				1128	1069	462	2250	1854	913
S9	798	725	463	2421	1648	746			S9	1083	1073	483	2200	1849	879
	864	714	464	2402	1711	757				1096	1047	484	2192	1825	925
	809	732	417	2458	1702	745				1123	1041	487	2191	1799	938
	845	747	469	2399	1652	746				1052	1058	511	2231	1851	934
S10	807	748	406	2421	1676	758			S10	1096	1076	475	2198	1787	923
	834	749	488	2417	1674	775				1088	1082	499	2217	1854	951
	809	745	473	2408	1646	769				1107	1037	502	2210	1828	922
	835	752	417	2450	1642	789				1093	1083	463	2221	1838	929
S11	819	712	408	2437	1662	768			S11	1073	1083	481	2204	1842	895
	866	760	448	2400	1705	819				1079	1070	450	2198	1837	905
	827	771	464	2386	1665	823				1054	1066	482	2205	1832	912
	827	781	401	2413	1642	758				1111	1069	482	2172	1851	905
S12	861	709	459	2404	1638	776			S12	1100	1082	491	2205	1841	909
	842	730	469	2393	1662	774				1085	1080	482	2178	1860	925
	841	709	439	2415	1653	745				1093	1102	497	2226	1835	929
	797	767	439	2421	1613	777				1110	1104	466	2209	1867	891
MEAN	960.438	881.542	468.979	2474.83	1777.54	884.625			MEAN	1087.04	1074.38	484.562	2202.12	1851.38	911.292
SD	224.471	226.259	59.1257	214.984	281.634	209.261			SD	180.683	188.657	73.0761	212.216	251.492	182.717
non-fatigue									fatigue
	RA（°）	EA（°）	Shooting Score	SS（s）						RA（°）	EA（°）	Shooting Score	SS（s）
S1	46.7	36.3	2	0.56					S1	43.6	33.2	2	0.78
	48.5	35	4	0.65						43.7	33.6	6	0.83
	46.4	36.1	4	0.67						45	30	4	0.83
	48.1	30.2	6	0.66						45.6	34.5	10	0.7
S2	50.8	43.2	10	0.56					S2	53.5	40.5	4	0.67
	51.9	42.1	6	0.67						49.6	41.8	2	0.87
	49.2	43	6	0.66						47.6	41.3	6	0.73
	48.5	42.1	10	0.53						55.6	43.5	6	0.72
S3	61.3	30	10	0.55					S3	58.6	35.7	6	0.8
	58.5	38	4	0.63						60.8	30	6	0.69
	56	36.5	10	0.65						61	37.9	10	0.73
	57.4	32.3	6	0.55						58.5	38.5	8	0.73
S4	46.7	36.3	4	0.56					S4	43.6	33.2	10	0.67
	48.5	28.9	4	0.56						43.7	33.6	10	0.63
	46.4	36.1	4	0.54						45	30	4	0.63
	51.5	25.1	2	0.67						45.6	34.5	10	0.7
S5	55.7	37	4	0.65					S5	54	32.6	6	0.68
	55	28	4	0.56						58	35.9	2	0.95
	53	30.2	6	0.69						58.5	37.5	10	0.68
	53.7	42.3	10	0.56						56.2	33	2	0.62
S6	65	40.8	10	0.7					S6	64	28	4	0.6
	69.2	41.5	10	0.75						66	35.3	4	0.63
	67.4	30.9	2	0.8						58	36.4	10	0.74
	53	27	4	0.85						60	36.2	8	0.63
S7	54.8	38.1	6	0.66					S7	51.2	34.4	10	0.63
	60.5	38.9	4	0.56						61	32.2	4	0.68
	61.6	38.3	8	0.63						60	30	6	0.7
	55	35.4	4	0.7						58	31	4	0.87
S8	51.4	30.6	2	0.61					S8	45.8	33.5	6	0.87
	57.3	39.1	6	0.69						46.6	26.4	8	0.63
	57.9	37.5	10	0.69						54	30.5	2	0.62
	45.1	30.8	6	0.63						51.1	29	4	0.85
S9	52.7	34.2	6	0.67					S9	45.1	38.7	8	0.63
	51.3	43.6	10	0.68						46	39.6	2	0.63
	48.3	33.6	6	0.66						51.6	30.9	4	0.83
	46.8	32.2	10	0.65						45.1	38.4	4	0.75
S10	50.1	37.3	4	0.62					S10	46.6	34.5	8	0.74
	59.1	44.8	10	0.61						50.5	36.9	6	0.73
	49.8	33.6	10	0.69						51.9	32.5	4	0.72
	52.8	40.1	6	0.69						51.5	33.7	10	0.69
S11	55.5	41.4	10	0.66					S11	47.2	40.2	8	0.67
	50.5	28.9	4	0.65						52.1	27.9	6	0.78
	59.6	28.5	4	0.66						47.4	35.8	4	0.79
	59.4	29.5	4	0.77						48.3	29.2	2	0.88
S12	48.8	39.5	10	0.69					S12	52.5	25.4	6	0.75
	52.5	39.5	10	0.66						51.5	43.2	4	0.75
	49.5	38	10	0.68						53.5	27.7	10	0.72
	49.3	31.4	4	0.66						51.5	39.1	8	0.73
MEAN	53.5	35.7021	6.375	0.647917					MEAN	51.9937	34.3208	6	0.726667
SD	5.6278	5.05138	2.81828	0.0667695					SD	6.05752	4.42662	2.70801	0.0834249

## Sheet: Internal Load Indicators
HR	HRmax		HR	Non-Fatigue	Fatigue			RMSSD	Non-Fatigue	Fatigue			LF/HF %	Non-Fatigue	Fatigue			BL	Non-Fatigue	Fatigue			RPE	Non-Fatigue	Fatigue
S1	197		S1	70.9	186			S1	36.62	3.1			S1	81.5	283.4			S1	0.7	11.11			S1	6	16
S2	188		S2	73	180			S2	56.03	5.16			S2	335.7	462.3			S2	1.1	11.73			S2	7	18
S3	169		S3	79.4	165			S3	46.26	4.75			S3	102.3	224.5			S3	1.85	10..58			S3	6	18
S4	191		S4	55	182			S4	27.08	3.02			S4	37.1	154.7			S4	1.1	8.85			S4	7	17
S5	197		S5	53.7	186			S5	65.43	6.9			S5	119.3	307.9			S5	1.15	11.82			S5	6	18
S6	197		S6	53.7	186			S6	44.05	4.58			S6	127.9	256.1			S6	1.6	9.15			S6	7	19
S7	182		S7	64.4	176			S7	64.36	5.12			S7	285.5	398.7			S7	0.55	10..07			S7	6	16
S8	181		S8	64.4	175			S8	27.13	3.33			S8	79.7	145.3			S8	0.82	7.4			S8	6	18
S9	181		S9	64.4	175			S9	50.01	4.91			S9	146.1	302.5			S9	1.5	5.16			S9	6	17
S10	182		S10	75.1	176			S10	48.33	5.65			S10	134.3	264.7			S10	1.78	5.85			S10	6	18
S11	184		S11	66.6	177			S11	34.04	3.82			S11	92.7	193.9			S11	1.3	6.98			S11	6	17
S12	181		S12	66.6	175			S12	71.45	6.69			S12	156.9	420.1			S12	1.25	8.5			S12	6	17
MEAN	185.8		MEAN	65.6	178.25			MEAN	47.5658	4.7525			MEAN	141.583	284.508			MEAN	1.225	8.655			MEAN	6.25	17.4167
SD	8.6		SD	8.34179	6.1515			SD	14.7831	1.2846			SD	86.168	101.42			SD	0.410465	2.36339			SD	0.452267	0.900337
